# Supplementary material
Source: Springer Nature journal article supplement (https://www.springermedizin.de/resource/supplementary/12885_2011_2769_MOESM9_ESM.pdf/9461902)

0% FS-No XRT

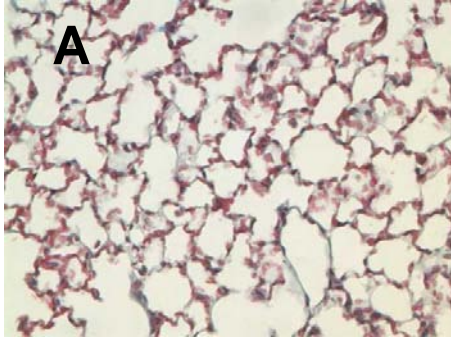

0%FS+XRT

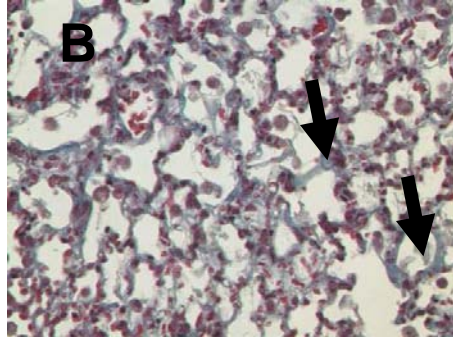

10% FS-No XRT

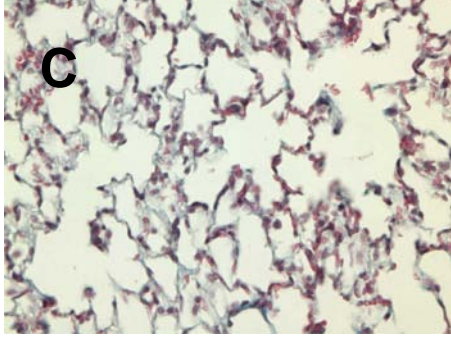

10%FS+XRT (-3wks)

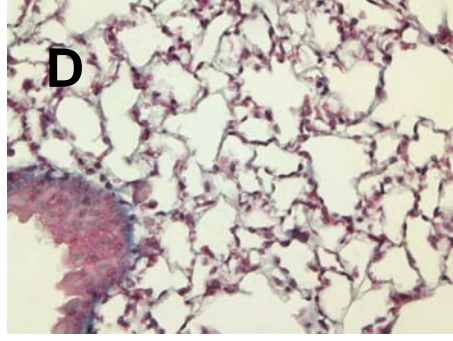

10%FS +XRT (0 Day)

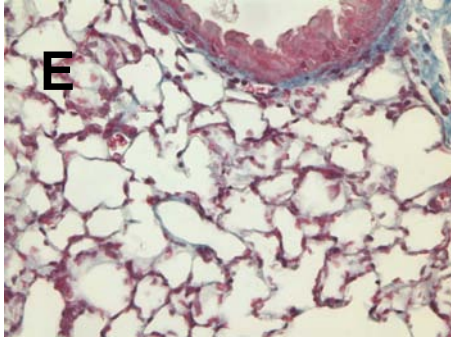

10%FS+XRT (+2wks)

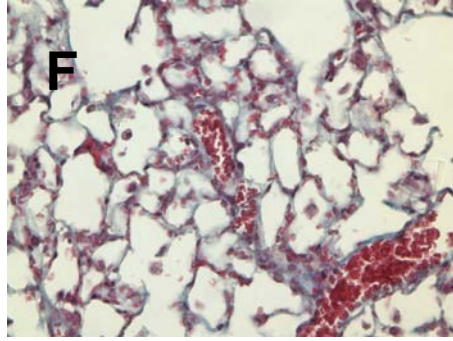

10%FS +XRT (+4wks)

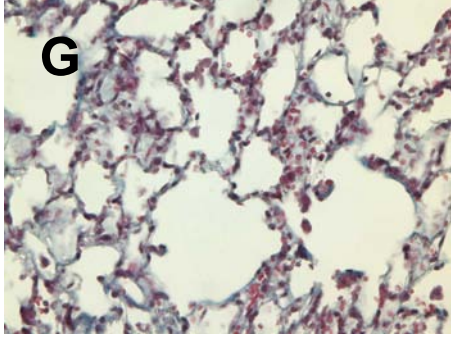

10%FS+XRT(+6wks)

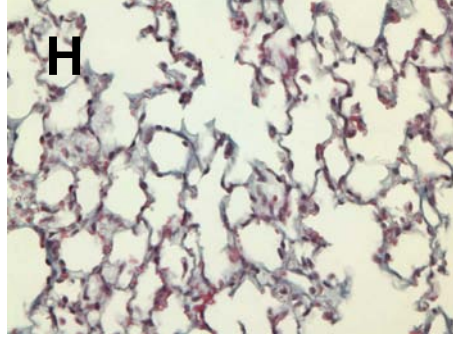

Supplement: MOESM9 [file 9461902]
